# Supplementary material for: Synchronizing ice-core and U/Th time scales in the Last Glacial Maximum using Hulu Cave 14 C and new 10 Be measurements from Greenland and Antarctica
Source: Copernicus journal article supplement (doi:10.5194/cp-2022-62), 2022-09-13
Supplement: Supplementary file 1 [file LGM_NorthGRIP2_WDC_10Be_Sinnl_et_al_2022.xlsx]

## Sheet: 1) Metadata
Beryllium-10 data over the Last Glacial Maximum from Greenland (NorthGRIP2 ice core) and Antarctica (WDC ice core)
Released 10 May 2022
Please cite the accompanying paper [1] when using these data:
Sinnl, et al. "Synchronizing ice-core and U/Th time scales in the Last Glacial Maximum using Hulu Cave 14C and new 10Be measurements from Greenland and Antarctica "
This file contains 3 sheets:
1) This documentation
2) NorthGRIP2 10Be
This dataset includes the 10Be concentrations for the North Greenland Ice Core Project deep ice core #2 (NorthGRIP2)
from 1726.45 m to 1816.51 m depth, produced by Copenhagen University, Lund University and ETH Zurich.
Ice samples, which represent continuous ice core sections of 0.14 or 0.28 m, were weighed, melted, acidified and ~0.15 mg Be carrier was added.
The Be fraction was eluted, purified and converted to BeO, which was mixed with Nb powder.
The 10Be/Be ratios of all samples were measured by accelerator mass spectrometry (AMS) at ETH Zurich lab [2].
The measured 10Be/Be ratios of the samples were corrected for an average blank 10Be/9Be ratio of 1.3 ± 0.3 10-14 which corresponds to typical blank corrections of 2-3% of the measured values.
The samples were decay corrected using a half-life of 1.387 ± 0.016 10^6 years.
The 10Be concentrations (in 10^4 atoms per gram of ice) and their 1-sigma uncertainties (between 1-10%) are listed along with the top and bottom depth and length (in meter) of each sample.
The top and bottom age of each sample corresponds to the GICC05 timescale [3]
The accumulation rates and 10Be fluxes are listed alongside with their respective errors, in accordance with the sample depth-resolutions.
3) WDC 10Be
This dataset includes the 10Be concentrations for the West Antarctic Ice sheet (WAIS) Divide ice core, WDC06A,
from 2453 to 2599 m depth, produced by UC Berkeley's Space Sciences Laboratory and Purdue's PRIME laboratory.
Ice samples, which represent continuous ice core sections of 1.89-2.12 m long, were weighed, melted, acidified and ~0.18 mg Be carrier was added [4, 5].
The samples were filtered through a 30 micron Millipore filter, and loaded on Dowex 50WX8 cation exchange columns.
The Be fraction was eluted, purified and converted to BeO, which was mixed with Nb powder.
The 10Be/Be ratios of all samples were measured by accelerator mass spectrometry (AMS) at PRIME lab [5, 6].
The measured 10Be/Be ratios of the samples were corrected for an average blank 10Be/9Be ratio of 10 ± 3 10-15 which corresponds to typical blank corrections of 1-2% of the measured values [7].
The 10Be concentrations (in 10^4 atoms per gram of ice) and their 1-sigma uncertainties (generally 1.5-3.5%) are listed along with the top and bottom depth and length (in meter) of each sample.
The top and bottom age of each sample corresponds to the WD2014 timescale [8]
The accumulation rates and 10Be fluxes are listed alongside with their respective errors, in accordance with the sample depth-resolutions.
References:
1	Sinnl G., Adolphi F., Christl M., Welten K.C., Woodruff T., Caffee M., Svensson A., Muscheler R., Rasmussen S.O. (2022) Synchronizing ice-core and U/Th time scales in the Last Glacial Maximum using Hulu Cave 14C and new 10Be measurements from Greenland and Antarctica Clim. Past. [submitted 09 August 2022]
2	Christl, M., Vockenhuber, C., Kubik, P. W., Wacker, L., Lachner, J., Alfimov, V., & Synal, H. A. (2013) The ETH Zurich AMS facilities: Performance parameters and reference materials. Nuclear Instruments and Methods in Physics Research Section B: Beam Interactions with Materials and Atoms, 294, 29-38. https://doi.org/10.1016/j.nimb.2012.03.004
3	Svensson, A., Andersen, K. K., Bigler, M., Clausen, H. B., Dahl-Jensen, D., Davies, S. M., ... & Vinther, B. M. (2008) A 60 000 year Greenland stratigraphic ice core chronology. Climate of the Past, 4(1), 47-57. https://doi.org/10.5194/cp-4-47-2008
4	Finkel R. C. and Nishiizumi K. (1997) Beryllium-10 concentrations in the Greenland Ice Sheet Project 2 ice core from 3-40 ka. J. Geophys. Res. 102, 26,699-26,706.
5	Woodruff T., Welten K. C., Caffee M. W. and Nishiizumi K. (2013). Inter-laboratory comparison of 10Be concentrations in two ice cores from Central West Antarctica. Nuclear Instruments and Methods B294, 77-80.
6	Sharma P. et al. 2000. PRIME lab AMS performance, upgrades and research applications. Nucl. Instr. Meth. B172, 112-123.
7	Nishiizumi K., Imamura M., Caffee M. W., Southon J. R., Finkel R. C. and McAninch J. (2007) Absolute calibration of 10Be AMS standards. Nucl. Instr. Meth. B258, 403-413.
8	Sigl M., et al. (2015) The WAIS Divide deep ice core WD2014 chronology - Part 2: Annual-layer counting (0–31 ka BP). Climate of the Past 11, 3425-3474.

## Sheet: 2) NorthGRIP2 10Be
sample ID (ETHZ)	Top depth (m)	Bottom depth (m)	Length (m)	Top Age (yr b2k)	Bottom Age (yr b2k)	Interval (yr)	10Be conc. (10^4 at/g) (blank+decay corrected)	err. 10Be conc. (10^4 at/g)	Acc. Rate (m_ice/y)	err. Acc. Rate (m ice/yr)	10Be flux (atm/cm^2/s)	err. 10Be flux (atm/cm^2/s)
LU0316NG	1726.45	1726.73	0.275	20038.7	20050	11.2792	4.01278	0.110275	0.074303	0.00371775	0.00866534	0.000494662
LU0317NG	1726.73	1727	0.275	20050	20061.8	11.8444	5.15832	0.101396	0.076889	0.00574917	0.0115267	0.000891165
LU0318NG	1727	1727.14	0.1375	20061.8	20066.9	5.10347	8.83875	0.172384	0.0853747	0.00679504	0.0219308	0.00179713
LU0319NG	1727.28	1727.41	0.1375	20073.6	20080	6.41296	3.56469	0.0989198	0.0690529	0.0068851	0.00715381	0.000740399
LU0320NG	1727.55	1727.83	0.275	20086.6	20100.8	14.2175	3.93982	0.0918421	0.0622776	0.00441358	0.00713085	0.000531997
LU0321NG	1727.83	1728.1	0.275	20100.8	20114	13.2472	4.33876	0.091198	0.0709152	0.00597051	0.00894209	0.000775963
LU0322NG	1728.1	1728.24	0.1375	20114	20120.1	6.06703	5.46174	0.228192	0.0757211	0.00826684	0.0120194	0.00140502
LU0323NG	1728.38	1728.51	0.1375	20126.8	20133.5	6.74051	3.14184	0.0825052	0.0716698	0.00787275	0.00654416	0.000739116
LU0324NG	1728.65	1728.79	0.1375	20139.2	20144.6	5.36087	3.61421	0.1069	0.0906056	0.0123407	0.00951703	0.00132646
LU0325NG	1728.93	1729.06	0.1375	20150.9	20156.8	5.86324	4.11718	0.0882417	0.0729276	0.00368821	0.00872621	0.00047931
LU0326NG	1729.2	1729.34	0.1375	20164.4	20170.5	6.11065	3.37015	0.233303	0.0722443	0.00554352	0.00707598	0.000731268
LU0327NG	1729.48	1729.61	0.1375	20176.7	20181.8	5.15185	3.58271	0.108426	0.0939946	0.00576751	0.00978697	0.0006696
LU0328NG	1729.75	1730.03	0.275	20187.3	20199.1	11.7508	4.57838	0.0846798	0.0777236	0.00570119	0.0103419	0.000782341
LU0329NG	1730.03	1730.3	0.275	20199.1	20209.4	10.3326	2.87605	0.0664713	0.093196	0.0107102	0.00778983	0.000913139
LU0331NG	1730.58	1730.71	0.1375	20221.1	20227.4	6.3406	3.38045	0.0888458	0.0690704	0.00528055	0.00678579	0.000548585
LU0332NG	1730.85	1731.13	0.275	20234	20245.1	11.1151	3.39033	0.0852278	0.0841953	0.00880787	0.00829591	0.00089256
LU0333NG	1731.13	1731.4	0.275	20245.1	20256.8	11.6193	2.88131	0.0637291	0.0801791	0.00582373	0.00671406	0.000509778
LU0335NG	1731.4	1731.54	0.1375	20256.8	20263.1	6.3058	2.66258	0.072348	0.0720685	0.00926907	0.00557675	0.000733085
LU0336NG	1731.95	1732.23	0.275	20279.7	20292	12.2913	3.24571	0.0625575	0.0766391	0.0066524	0.00722927	0.000642796
LU0337NG	1732.23	1732.5	0.275	20292	20303.4	11.4031	2.80949	0.0847926	0.07619	0.005932	0.006221	0.000519472
LU0338NG	1732.5	1732.78	0.275	20303.4	20314.5	11.1091	3.90093	0.100425	0.0870144	0.00803861	0.00986491	0.000946069
LU0339NG	1732.78	1733.05	0.275	20314.5	20325.7	11.2606	3.19454	0.0732968	0.0800978	0.00652745	0.00743641	0.000629581
LU0340NG	1733.05	1733.33	0.275	20325.7	20340.3	14.594	3.59774	0.0745639	0.0611612	0.00387199	0.00639499	0.000425996
LU0341NG	1733.33	1733.6	0.275	20340.3	20352.3	12.0086	5.08381	0.153137	0.077107	0.00683224	0.0113924	0.00106619
LU0342NG	1733.6	1733.88	0.275	20352.3	20366	13.6174	5.52347	0.107418	0.0673384	0.00453767	0.0108096	0.000758143
LU0343NG	1733.88	1734.15	0.275	20366	20380.3	14.3826	4.93507	0.0904736	0.0605555	0.00347788	0.00868522	0.000523615
LU0344NG	1734.15	1734.43	0.275	20380.3	20393.7	13.3421	4.7441	0.0795675	0.065847	0.0034875	0.00907869	0.000504374
LU0345NG	1734.43	1734.7	0.275	20393.7	20405.4	11.7412	5.05925	0.132357	0.082104	0.0082263	0.0120721	0.00125011
LU0346NG	1734.7	1734.84	0.1375	20405.4	20411.3	5.87692	6.19504	0.103741	0.0741642	0.00571824	0.0133528	0.00105354
LU0347NG	1734.98	1735.11	0.1375	20417.4	20423.8	6.37188	3.35938	0.0895987	0.069352	0.00765886	0.00677099	0.00076925
LU0348NG	1735.25	1735.53	0.275	20431.6	20445.3	13.6573	3.01672	0.0770015	0.0634486	0.00404484	0.00556278	0.000381996
LU0349NG	1735.53	1735.8	0.275	20445.3	20458.8	13.4649	3.57205	0.0732248	0.0777212	0.00823908	0.00806847	0.000871168
LU0350NG	1735.8	1735.94	0.1375	20458.8	20465.7	6.97126	3.57245	0.118431	0.0633626	0.00414973	0.0065786	0.000482896
LU0351NG	1736.08	1736.21	0.1375	20471.3	20477.9	6.67549	3.84628	0.124123	0.0658755	0.00585756	0.00736375	0.000696563
LU0352NG	1736.35	1736.63	0.275	20483	20495.9	12.8639	4.62385	0.109794	0.0696373	0.00486485	0.00935791	0.000690474
LU0353NG	1736.63	1736.9	0.275	20495.9	20507.4	11.485	3.94461	0.152412	0.0866098	0.00916018	0.00992898	0.00111801
LU0354NG	1736.9	1737.04	0.1375	20507.4	20513.5	6.12302	3.26796	0.138151	0.0787148	0.0104558	0.00747596	0.00104212
LU0355NG	1737.18	1737.31	0.1375	20520.5	20526.7	6.16071	4.09781	0.11364	0.0658989	0.00446978	0.00784808	0.000575092
LU0356NG	1737.45	1737.73	0.275	20533.4	20545.2	11.7498	4.05002	0.102975	0.0760754	0.00495104	0.00895437	0.000625652
LU0357NG	1737.73	1738	0.275	20545.2	20556.1	10.9327	5.00506	0.0911714	0.0804085	0.00493067	0.0116962	0.000748192
LU0358NG	1738	1738.14	0.1375	20556.1	20561.9	5.83312	3.63173	0.137089	0.0766729	0.00665013	0.00809262	0.000765496
LU0359NG	1738.28	1738.41	0.1375	20568.7	20575.1	6.33357	4.75201	0.125705	0.0738984	0.00502829	0.0102058	0.000745067
LU0360NG	1738.55	1738.83	0.275	20582.8	20594.1	11.3156	3.80215	0.0773486	0.0824612	0.00690676	0.00911197	0.000785386
LU0361NG	1738.83	1739.1	0.275	20594.1	20606.5	12.3987	3.55815	0.0845495	0.0732219	0.00517045	0.00757179	0.000564132
LU0362NG	1739.1	1739.24	0.1375	20606.5	20611.9	5.42634	4.21532	0.0988402	0.0857976	0.0131792	0.0105109	0.00163326
LU0363NG	1739.38	1739.51	0.1375	20617.3	20623.6	6.30053	3.09451	0.0826611	0.065657	0.00528644	0.00590482	0.000500914
LU03164G	1739.65	1739.93	0.275	20630.4	20643.5	13.0507	3.59661	0.110555	0.0710534	0.00478912	0.00742698	0.000550192
LU0365NG	1739.93	1740.2	0.275	20643.5	20655.6	12.0832	3.00073	0.0716512	0.0744401	0.00562171	0.00649183	0.000514185
LU0366NG	1740.2	1740.34	0.1375	20655.6	20661.3	5.69868	3.3944	0.148596	0.0776575	0.0085059	0.00766092	0.000903645
LU0367NG	1740.48	1740.61	0.1375	20666.5	20672.9	6.43549	2.20023	0.137324	0.0755497	0.00808256	0.00483097	0.000598357
LU0368NG	1740.75	1741.03	0.275	20679.2	20694	14.8278	4.20583	0.136465	0.0634883	0.0047394	0.00776032	0.000631664
LU0369NG	1741.03	1741.3	0.275	20694	20708.4	14.3568	3.36634	0.0589809	0.0635968	0.00470468	0.00622197	0.000473013
LU0370NG	1741.3	1741.44	0.1375	20708.4	20714.6	6.17983	3.37692	0.108233	0.0738642	0.00855233	0.00724917	0.000870906
LU0371NG	1741.58	1741.71	0.1375	20721.5	20728.1	6.5755	3.39373	0.0990582	0.070171	0.00574307	0.00692099	0.000601386
LU0372NG	1741.85	1742.13	0.275	20734.1	20746.4	12.314	3.63459	0.0963352	0.0754696	0.00567298	0.00797189	0.000635401
LU0373NG	1742.13	1742.4	0.275	20746.4	20758.5	12.101	4.17304	0.0688544	0.0786683	0.00748337	0.00954084	0.00092113
LU0374NG	1742.4	1742.54	0.1375	20758.5	20764.4	5.89309	4.48361	0.147657	0.0737314	0.00288056	0.00960758	0.000490916
LU0375NG	1742.68	1742.81	0.1375	20771.3	20777.5	6.224	3.64756	0.0915912	0.0755297	0.00888406	0.00800671	0.000962998
LU0376NG	1742.95	1743.23	0.275	20783.5	20795.5	12.0017	4.47982	0.0863	0.0761713	0.00538793	0.00991713	0.000727032
LU0377NG	1743.23	1743.5	0.275	20795.5	20810.1	14.6199	3.70182	0.128382	0.0624675	0.00429612	0.00672053	0.000517637
LU0378NG	1743.5	1743.64	0.1375	20810.1	20816.8	6.74567	3.63699	0.16977	0.0643594	0.00369789	0.0068028	0.0005036
LU0379NG	1743.78	1743.91	0.1375	20823.7	20830.2	6.44152	3.61539	0.0883883	0.0692677	0.00505681	0.00727814	0.000560334
LU0380NG	1744.05	1744.33	0.275	20836.4	20850	13.6062	4.11663	0.0849372	0.066326	0.00395832	0.00793524	0.000501076
LU0381NG	1744.33	1744.6	0.275	20850	20863.9	13.8835	3.51702	0.0977181	0.0677147	0.00512509	0.00692135	0.000558035
LU0382NG	1744.6	1744.88	0.275	20863.9	20876.5	12.6326	3.25056	0.0681936	0.0778034	0.00703683	0.00735005	0.000682415
LU0383NG	1744.88	1745.15	0.275	20876.5	20890.8	14.223	4.76177	0.0855241	0.0624702	0.00395985	0.00864521	0.000569574
LU0384NG	1745.15	1745.43	0.275	20890.8	20904.9	14.1619	3.23488	0.0873555	0.0672863	0.00553777	0.00632585	0.000547937
LU0385NG	1745.43	1745.7	0.275	20904.9	20917.6	12.6845	4.55682	0.332867	0.0754448	0.00683557	0.00999138	0.00116283
LU0386NG	1745.7	1745.98	0.275	20917.6	20933.1	15.4965	4.42777	0.0725625	0.0581425	0.00399539	0.00748191	0.000528554
LU0387NG	1745.98	1746.25	0.275	20933.1	20947.2	14.0924	3.34488	0.0625702	0.0670311	0.00485002	0.00651614	0.000486976
LU0388NG	1746.25	1746.53	0.275	20947.2	20960.3	13.1139	4.09481	0.063928	0.0701966	0.00496023	0.00835381	0.000604532
LU0389NG	1746.8	1747.08	0.275	20974	20988.5	14.4095	4.67432	0.0776441	0.062609	0.003535	0.00850528	0.000500572
LU0390NG	1747.08	1747.35	0.275	20988.5	21003.3	14.8429	4.63553	0.0816482	0.0607044	0.00376759	0.00817812	0.000527616
LU0391NG	1747.35	1747.63	0.275	21003.3	21017.1	13.8253	3.45119	0.0740343	0.0660544	0.00463122	0.00662528	0.000485769
LU0392NG	1747.63	1747.9	0.275	21017.1	21031.3	14.1747	3.31738	0.0695131	0.0632736	0.00320125	0.00610031	0.000334062
LU0393NG	1747.9	1748.04	0.1375	21031.3	21038.6	7.3467	4.32735	0.0953313	0.0599199	0.00489188	0.00753576	0.000637227
LU0394NG	1748.18	1748.31	0.1375	21045.5	21052.7	7.19251	3.7627	0.104401	0.0656298	0.00763186	0.00717686	0.000858
LU0395NG	1748.45	1748.73	0.275	21060.8	21075.8	15.094	4.71589	0.128078	0.0589408	0.0032973	0.00807818	0.000502355
LU0396NG	1749	1749.14	0.1375	21090.4	21097.5	7.07837	3.65747	0.545529	0.0679579	0.00753292	0.00722361	0.00134239
LU0397NG	1749.28	1749.41	0.1375	21104.9	21112.3	7.40251	4.10111	0.0806121	0.0597469	0.00534708	0.00712116	0.000652502
LU0398NG	1749.55	1749.83	0.275	21120.5	21135.4	14.8611	4.27065	0.138187	0.0603062	0.00282826	0.00748496	0.000426476
LU0399NG	1749.83	1750.1	0.275	21135.4	21149.7	14.3056	3.07557	0.0853229	0.0652125	0.00495059	0.00582895	0.000471125
LU0400NG	1750.1	1750.24	0.1375	21149.7	21157.2	7.56625	3.48129	0.083025	0.0617184	0.00684279	0.00624437	0.000708157
LU0401NG	1750.38	1750.51	0.1375	21164.6	21171	6.39115	4.22452	0.0822994	0.0738754	0.0103491	0.00907007	0.00128284
LU0402NG	1750.65	1750.93	0.275	21178.4	21190.7	12.2879	3.6172	0.0657224	0.0728633	0.00464234	0.00765977	0.000507483
LU0403NG	1750.93	1751.2	0.275	21190.7	21205.4	14.7929	4.73019	0.0775855	0.0647197	0.00516078	0.00889711	0.000724313
LU0404NG	1751.2	1751.34	0.1375	21205.4	21212.2	6.74826	3.83725	0.103311	0.0659983	0.00346692	0.00736015	0.000434455
LU0405NG	1751.48	1751.61	0.1375	21218.7	21225	6.26972	3.91523	0.108781	0.0759378	0.00835532	0.0086407	0.000980567
LU0406NG	1751.75	1752.03	0.275	21232.4	21246.3	13.8839	3.92496	0.10394	0.0660944	0.0044106	0.00753934	0.000541282
LU0407NG	1752.03	1752.3	0.275	21246.3	21259.3	13.0889	3.80738	0.188792	0.070237	0.00515477	0.00777189	0.000688372
LU0409NG	1752.58	1752.71	0.1375	21273	21280.1	7.05016	4.2512	0.0818545	0.0648196	0.00592239	0.00800852	0.000747787
LU0410NG	1752.85	1753.13	0.275	21288.1	21302.1	14.068	2.96445	0.0608422	0.0689073	0.00587085	0.00593668	0.000520269
LU0411NG	1753.13	1753.4	0.275	21302.1	21317.1	14.927	3.12974	0.0622487	0.0638225	0.00500402	0.00580518	0.000469573
LU0412NG	1753.4	1753.54	0.1375	21317.1	21324.5	7.44444	3.77017	0.263923	0.061729	0.00457479	0.0067637	0.000689527
LU0413NG	1753.68	1753.81	0.1375	21331.1	21338.2	7.12674	3.75192	0.0841088	0.0628059	0.00717777	0.00684838	0.000797582
LU0414NG	1753.95	1754.23	0.275	21345.2	21357.8	12.5657	5.02307	0.247274	0.0740761	0.00534792	0.0108139	0.000944929
LU0415NG	1754.23	1754.5	0.275	21357.8	21371.7	13.8938	4.09855	0.0778865	0.0647536	0.00379257	0.00771307	0.000474933
LU0416NG	1754.5	1754.64	0.1375	21371.7	21379.9	8.28	5.68053	0.173837	0.0571731	0.006478	0.00943876	0.00110778
LU0417NG	1754.78	1754.91	0.1375	21387.6	21395.6	7.99205	4.43113	0.0880455	0.0576668	0.00456375	0.00742632	0.00060596
LU0418NG	1755.05	1755.33	0.275	21402.4	21416.9	14.4487	5.06032	0.087874	0.0683269	0.00578577	0.0100486	0.000868598
LU0419NG	1755.33	1755.6	0.275	21416.9	21431.3	14.4767	3.84087	0.0870447	0.0627688	0.00462517	0.00700661	0.000540154
LU0420NG	1755.6	1755.74	0.1375	21431.3	21439.4	8.08784	3.40128	0.0911529	0.0659949	0.00838591	0.00652359	0.000847182
LU0421NG	1755.88	1756.01	0.1375	21446.6	21453.5	6.89827	3.28589	0.0996717	0.0612346	0.00468081	0.00584768	0.000480908
LU0422NG	1756.15	1756.43	0.275	21460.6	21473.1	12.5147	3.74893	0.0862945	0.0753527	0.00696983	0.00820995	0.000782549
LU0423NG	1756.43	1756.7	0.275	21473.1	21488.6	15.5237	6.31237	0.0967854	0.0618319	0.00448512	0.0113433	0.000840992
LU0424NG	1756.7	1756.84	0.1375	21488.6	21497.1	8.48462	4.5312	0.117107	0.0553553	0.00575402	0.00728965	0.000780807
LU0425NG	1756.98	1757.11	0.1375	21505.2	21512.7	7.58723	4.55339	0.198279	0.0595548	0.00538438	0.00788108	0.000790871
LU0426NG	1757.25	1757.53	0.275	21519.4	21532	12.6149	3.83054	0.0756748	0.0785105	0.00727934	0.00874021	0.000828567
LU0427NG	1757.53	1757.8	0.275	21532	21546.9	14.8988	3.54792	0.0784811	0.0605049	0.00369017	0.00623876	0.000404753
LU0428NG	1757.8	1757.94	0.1375	21546.9	21554.1	7.18711	3.90723	0.0885561	0.0620654	0.00618719	0.00704779	0.000720511
LU0429NG	1758.08	1758.21	0.1375	21561.8	21570.3	8.51491	3.21642	0.0853947	0.0537244	0.00559039	0.00502201	0.000539316
LU0430NG	1758.35	1758.63	0.275	21577.8	21592.9	15.0476	3.34342	0.0694742	0.0621326	0.00420696	0.00603731	0.0004276
LU0431NG	1758.63	1758.9	0.275	21592.9	21606.6	13.759	3.96756	0.0840356	0.0679055	0.00481759	0.00783001	0.000579732
LU0432NG	1758.9	1759.04	0.1375	21606.6	21613.8	7.11893	4.71717	0.203421	0.0804143	0.0148617	0.0110242	0.00209216
LU0433NG	1759.18	1759.31	0.1375	21619.9	21627	7.04333	5.28713	0.307447	0.0683749	0.00710868	0.0105063	0.00125155
LU0434NG	1759.45	1759.73	0.275	21633.8	21649.5	15.6854	3.66675	0.0977363	0.0602348	0.00420105	0.00641894	0.000479267
LU0435NG	1759.73	1760	0.275	21649.5	21664.9	15.3943	3.79642	0.0918669	0.0593245	0.00347936	0.00654549	0.000415282
LU0436NG	1760	1760.14	0.1375	21664.9	21673.1	8.14341	5.0992	0.109008	0.0650878	0.0090728	0.00964574	0.00136027
LU0437NG	1760.28	1760.41	0.1375	21680.8	21688.8	7.97024	4.60299	0.0880975	0.0575551	0.00382261	0.00769943	0.000532178
LU0438NG	1760.55	1760.83	0.275	21696.1	21710	13.9245	5.55396	0.0855686	0.0664114	0.00441595	0.0107196	0.000731672
LU0439NG	1760.83	1761.1	0.275	21710	21723.8	13.7102	5.44192	0.0839684	0.0738825	0.00712377	0.011685	0.001141
LU0440NG	1761.1	1761.38	0.275	21723.8	21737.1	13.3782	6.16832	0.113433	0.0733068	0.00606301	0.0131415	0.00111344
LU0441NG	1761.38	1761.65	0.275	21737.1	21753.1	15.9895	5.07473	0.0784171	0.0589639	0.00444684	0.00869628	0.000669467
LU0442NG	1761.65	1761.93	0.275	21753.1	21766.5	13.4157	5.00267	0.0773911	0.069296	0.00479452	0.010075	0.000714289
LU0443NG	1761.93	1762.2	0.275	21766.5	21781.7	15.1333	4.38024	0.0682351	0.0598426	0.00314883	0.00761803	0.000418047
LU0444NG	1762.2	1762.34	0.1375	21781.7	21789.8	8.11207	4.96068	0.093874	0.0606195	0.00820173	0.00873952	0.00119395
LU0445NG	1762.48	1762.61	0.1375	21796.5	21804	7.51646	4.76351	0.0960419	0.0607846	0.00711925	0.008415	0.00100008
LU0446NG	1762.75	1763.03	0.275	21811.8	21825.9	14.1414	4.37767	0.0788025	0.0717545	0.00725152	0.00912906	0.000937106
LU0447NG	1763.03	1763.3	0.275	21825.9	21840.4	14.4365	4.12458	0.103384	0.0692077	0.0060065	0.00829598	0.000749431
LU0448NG	1763.3	1763.44	0.1375	21840.4	21848	7.63276	4.03665	0.0829101	0.0630072	0.00628277	0.00739173	0.00075254
LU0449NG	1763.58	1763.71	0.1375	21855.3	21862.7	7.42708	3.86841	0.0819619	0.0595538	0.00481178	0.00669539	0.000559259
LU0450NG	1763.85	1764.13	0.275	21869.9	21883.5	13.55	3.98808	0.0793022	0.0686464	0.00503254	0.00795639	0.000604366
LU0451NG	1764.13	1764.4	0.275	21883.5	21897.1	13.6703	3.93435	0.0680303	0.068653	0.00448279	0.00784993	0.00053024
LU0452NG	1764.4	1764.54	0.1375	21897.1	21904.4	7.28783	3.56606	0.0910057	0.0647342	0.00598797	0.00670898	0.000643771
LU0453NG	1764.68	1764.81	0.1375	21911.2	21917.5	6.32292	5.20373	0.106263	0.0717868	0.00721452	0.0108566	0.00111337
LU0454NG	1764.95	1765.23	0.275	21924.1	21937.9	13.8506	3.28972	0.0597997	0.0664954	0.00454968	0.00635747	0.000450074
LU0455NG	1765.23	1765.5	0.275	21937.9	21953.4	15.4291	3.6112	0.0805788	0.0605788	0.00349265	0.00635779	0.000393051
LU0456NG	1765.5	1765.78	0.275	21953.4	21968.3	14.9564	5.50176	0.11201	0.0613365	0.00368919	0.00980741	0.00062276
LU0457NG	1765.78	1766.05	0.275	21968.3	21982.9	14.5436	3.76895	0.108354	0.0637382	0.00390539	0.00698158	0.000472526
LU0458NG	1766.05	1766.33	0.275	21982.9	21998	15.1114	4.46207	0.172352	0.0622632	0.00461787	0.00807424	0.000675188
LU0459NG	1766.33	1766.6	0.275	21998	22012.8	14.8557	3.20739	0.0938859	0.0643846	0.00442516	0.00600161	0.000448343
LU0460NG	1766.6	1766.74	0.1375	22012.8	22021.2	8.33633	5.21092	0.144398	0.054906	0.00425182	0.00831511	0.000683892
LU0461NG	1766.88	1767.01	0.1375	22028	22036.5	8.40551	3.62604	0.108741	0.0568295	0.00544439	0.00598882	0.000601194
LU0462NG	1767.15	1767.43	0.275	22043.5	22059.3	15.8532	4.26091	0.108928	0.0601223	0.00413033	0.00744513	0.000545737
LU0463NG	1767.43	1767.7	0.275	22059.3	22074.8	15.4966	4.73165	0.143191	0.0654549	0.00585492	0.00900095	0.000849962
LU0464NG	1767.7	1767.98	0.275	22074.8	22088.9	14.0908	3.39313	0.113986	0.0684572	0.00513221	0.00675078	0.00055459
LU0465NG	1767.98	1768.25	0.275	22088.9	22104.5	15.6312	5.26884	0.297787	0.0595378	0.00374732	0.00911678	0.000771207
LU0466NG	1768.25	1768.53	0.275	22104.5	22121.3	16.7435	4.11389	0.15334	0.0555483	0.00300806	0.00664137	0.000436606
LU0467NG	1768.53	1768.8	0.275	22121.3	22136.6	15.2917	5.03446	0.166883	0.0615963	0.00410057	0.00901243	0.000670235
LU0468NG	1768.8	1769.08	0.275	22136.6	22151.5	14.9019	4.14199	0.106273	0.0590079	0.00314932	0.00710319	0.000420637
LU0469NG	1769.08	1769.35	0.275	22151.5	22166.2	14.6713	4.88743	0.138755	0.0674857	0.00540412	0.00958577	0.000814423
LU0470NG	1769.35	1769.63	0.275	22166.2	22180.6	14.397	4.10363	0.111132	0.0627902	0.00291296	0.00748848	0.000402265
LU0471NG	1769.63	1769.9	0.275	22180.6	22195	14.4491	3.56626	0.112373	0.0660411	0.00501781	0.00684481	0.000563019
LU0472NG	1769.9	1770.04	0.1375	22195	22201.2	6.23104	5.09399	0.151751	0.0691512	0.00462028	0.0102375	0.000748915
LU0473NG	1770.18	1770.31	0.1375	22209	22216.2	7.25001	4.07552	0.145691	0.0689567	0.00793651	0.00816758	0.00098434
LU0474NG	1770.45	1770.73	0.275	22224.2	22239.7	15.4833	4.09335	0.0854171	0.0644343	0.00522031	0.00766531	0.000641293
LU0475NG	1770.73	1771	0.275	22239.7	22253.7	13.9467	3.58663	0.0938969	0.0682229	0.00522966	0.00711132	0.000576037
LU0476NG	1771	1771.14	0.1375	22253.7	22260.1	6.38429	3.41709	0.10346	0.0760754	0.0120053	0.007555	0.00121398
LU0477NG	1771.28	1771.41	0.1375	22267.4	22275.4	7.9869	4.6566	0.115907	0.0582972	0.00553748	0.00788953	0.000774705
LU0478NG	1771.55	1771.83	0.275	22283.9	22300.3	16.4784	4.23687	0.142543	0.0554898	0.00330111	0.00683269	0.000466978
LU0479NG	1771.83	1772.1	0.275	22300.3	22314.4	14.0097	4.36331	0.149276	0.0656422	0.00368263	0.00832402	0.000546973
LU0480NG	1772.1	1772.24	0.1375	22314.4	22321.6	7.21113	4.22386	0.157497	0.0667765	0.00675302	0.00819722	0.000883529
LU0481NG	1772.38	1772.51	0.1375	22329.3	22336.9	7.56525	3.56329	0.147548	0.0599358	0.0058623	0.00620685	0.000659252
LU0482NG	1772.65	1772.93	0.275	22343.8	22358.9	15.0989	2.60892	0.166047	0.062543	0.00379937	0.00474214	0.000417231
LU0483NG	1772.93	1773.2	0.275	22358.9	22373.2	14.3103	4.26055	0.104644	0.0653451	0.00469396	0.00809119	0.000614254
LU0484NG	1773.2	1773.34	0.1375	22373.2	22380	6.80207	6.45343	0.155147	0.0660143	0.00549101	0.0123812	0.00107201
LU0485NG	1773.48	1773.61	0.1375	22386.1	22393.1	6.96678	4.6842	0.133936	0.0816947	0.0116671	0.0111215	0.00161982
LU0486NG	1773.75	1774.03	0.275	22400.9	22415.3	14.3855	3.27521	0.0966824	0.063935	0.00403017	0.00608572	0.000423596
LU0487NG	1774.03	1774.3	0.275	22415.3	22430	14.7094	4.44968	0.0912165	0.0653262	0.00438012	0.00844793	0.000592315
LU0488NG	1774.3	1774.58	0.275	22430	22441.9	11.9607	2.89715	0.0835063	0.0822243	0.00685533	0.00692316	0.00061073
LU0489NG	1774.58	1774.85	0.275	22441.9	22456.6	14.6567	3.78773	0.125731	0.0610448	0.00306206	0.00671988	0.000404198
LU0490NG	1774.85	1775.13	0.275	22456.6	22470.4	13.7828	4.08065	0.0977164	0.0702201	0.00512039	0.0083277	0.000639154
LU0491NG	1775.13	1775.4	0.275	22470.4	22483.4	13.0668	3.28156	0.0929463	0.0689368	0.00390627	0.00657453	0.000416491
LU0492NG	1775.4	1775.54	0.1375	22483.4	22489.8	6.39087	3.75718	0.095133	0.074179	0.00754023	0.00809985	0.000848502
LU0493NG	1775.68	1775.81	0.1375	22496.9	22503.2	6.29345	4.42059	0.126443	0.0739101	0.00860315	0.0094955	0.00113816
LU0494NG	1775.95	1776.23	0.275	22510.2	22523.3	13.1173	4.60106	0.094511	0.0779397	0.00718954	0.010422	0.000984922
LU0495NG	1776.23	1776.5	0.275	22523.3	22535.7	12.4708	3.89949	0.0969034	0.075325	0.00582747	0.00853653	0.000693657
LU0496NG	1776.5	1776.64	0.1375	22535.7	22542.6	6.84931	5.34669	0.146677	0.071865	0.00810544	0.011167	0.00129621
LU0497NG	1776.78	1776.91	0.1375	22549.8	22557.5	7.70294	4.13735	0.113628	0.0577356	0.00447651	0.00694225	0.000571035
LU0498NG	1777.05	1777.33	0.275	22565.1	22579.4	14.2473	3.84808	0.115484	0.0653023	0.00428006	0.00730308	0.000526452
LU0499NG	1777.33	1777.6	0.275	22579.4	22592.9	13.4617	2.92342	0.0768347	0.0768997	0.00733485	0.00653355	0.000646409
LU0500NG	1777.6	1777.74	0.1375	22592.9	22599.5	6.69101	5.18582	0.164886	0.0736482	0.00907	0.0110998	0.00141179
LU0501NG	1777.88	1778.01	0.1375	22606.9	22613.5	6.59086	3.91194	0.129414	0.0821732	0.013622	0.00934235	0.00157923
LU0502NG	1778.15	1778.43	0.275	22621.9	22634.9	13.0846	3.59341	0.094234	0.0722322	0.00469936	0.00754348	0.000529141
LU0503NG	1778.43	1778.7	0.275	22634.9	22650.3	15.3741	3.69429	0.0849077	0.0589627	0.00274866	0.00633056	0.00032903
LU0504NG	1778.7	1778.84	0.1375	22650.3	22657.3	6.95558	3.87157	0.10943	0.0648029	0.00481195	0.00729147	0.000579327
LU0505NG	1778.98	1779.11	0.1375	22664.6	22672.2	7.57403	4.0933	0.122838	0.0613253	0.00695487	0.00729537	0.00085584
LU0506NG	1779.25	1779.53	0.275	22679	22693.9	14.853	3.02741	0.0768311	0.060791	0.00312752	0.00534865	0.000306832
LU0507NG	1779.53	1779.8	0.275	22693.9	22707.2	13.3742	4.43776	0.17516	0.0706348	0.00406417	0.00910996	0.000635644
LU0508NG	1779.8	1779.94	0.1375	22707.2	22715.6	8.41984	3.41251	0.0962863	0.0546914	0.00331791	0.00542408	0.000362908
LU0509NG	1780.08	1780.21	0.1375	22721.3	22726.7	5.42303	3.14362	0.0964882	0.0844706	0.00785656	0.00771736	0.000755862
LU0510NG	1780.35	1780.63	0.275	22734.2	22746.6	12.443	2.468	0.0975472	0.0756619	0.00525605	0.00542695	0.000433748
LU0511NG	1780.63	1780.9	0.275	22746.6	22759.2	12.5276	3.46306	0.0897232	0.0786482	0.00655704	0.00791557	0.000691067
LU0512NG	1780.9	1781.04	0.1375	22759.2	22766.8	7.62387	2.77002	0.0903521	0.0609859	0.00454333	0.00490961	0.000399278
LU0513NG	1781.18	1781.31	0.1375	22773.3	22780.2	6.92143	2.3649	0.0724254	0.0660859	0.00506738	0.00454209	0.000375032
LU0514NG	1781.45	1781.73	0.275	22785.7	22799.6	13.8679	3.73035	0.0745547	0.0715045	0.00610609	0.00775204	0.000679871
LU0515NG	1781.73	1782	0.275	22799.6	22813.5	13.9464	2.73746	0.065406	0.068917	0.00505245	0.00548288	0.00042277
LU0516NG	1782	1782.14	0.1375	22813.5	22821	7.47756	4.73419	0.206824	0.0601404	0.00382624	0.00827458	0.000638608
LU0517NG	1782.28	1782.41	0.1375	22828.2	22836.6	8.48544	4.69424	0.103624	0.0541608	0.0036718	0.00738897	0.000526818
LU0518NG	1782.55	1782.83	0.275	22846.5	22859.2	12.6998	3.63077	0.0802527	0.0737642	0.00501084	0.00778355	0.000556027
LU0519NG	1782.83	1783.1	0.275	22859.2	22873.3	14.0611	4.94592	0.108945	0.0672808	0.0042714	0.00967102	0.000649882
LU0520NG	1783.1	1783.24	0.1375	22873.3	22880	6.75476	4.34557	0.105902	0.0702747	0.00602073	0.00887522	0.000790541
LU0521NG	1783.38	1783.51	0.1375	22887.1	22894.4	7.30901	4.71594	0.0968829	0.0644157	0.00622694	0.00882864	0.000872508
LU0522NG	1783.65	1783.93	0.275	22901.5	22915.2	13.7115	3.43096	0.0782071	0.0709509	0.00567336	0.00707468	0.000588241
LU0523NG	1783.93	1784.2	0.275	22915.2	22928.1	12.8167	3.87156	0.0716044	0.0765146	0.0066645	0.00860922	0.000766591
LU0524NG	1784.2	1784.34	0.1375	22928.1	22933.7	5.59411	3.65165	0.131526	0.0905145	0.0127254	0.00960596	0.00139411
LU0525NG	1784.48	1784.61	0.1375	22940.2	22945.3	5.06662	2.59537	0.0681762	0.102771	0.0165233	0.00775178	0.00126285
LU0526NG	1784.75	1785.03	0.275	22951.2	22962.6	11.3765	2.56214	0.0825753	0.0863268	0.00730615	0.00642808	0.000582143
LU0527NG	1785.03	1785.3	0.275	22962.6	22974.9	12.2728	3.16571	0.0623368	0.079526	0.00717936	0.00731667	0.000676057
LU0528NG	1785.3	1785.44	0.1375	22974.9	22981.2	6.34753	2.93103	0.10942	0.0746465	0.00736781	0.00635862	0.000671003
LU0529NG	1785.58	1785.71	0.1375	22987	22992.9	5.89757	3.02727	0.0852519	0.0835129	0.00978435	0.00734748	0.000885347
LU0530NG	1785.85	1785.99	0.1375	23000	23006.3	6.26272	4.03135	0.0824512	0.0768847	0.00843833	0.00900791	0.00100567
LU0531NG	1786.13	1786.26	0.1375	23012.8	23019	6.24203	4.08515	0.111794	0.0732131	0.00636441	0.00869222	0.00079217
LU0532NG	1786.4	1786.68	0.275	23026.5	23041.5	14.9945	4.2627	0.0830408	0.0659062	0.00597774	0.0081648	0.000757441
LU0533NG	1786.68	1786.95	0.275	23041.5	23054.7	13.1951	3.79706	0.100732	0.0750106	0.00529891	0.00827759	0.00062462
LU0534NG	1786.95	1787.23	0.275	23054.7	23067.7	13.0372	3.1907	0.0750449	0.0736244	0.00516556	0.00682717	0.000505199
LU0536NG	1787.5	1787.64	0.1375	23079.4	23085.4	6.01579	6.34269	0.155139	0.0846081	0.0101405	0.0155962	0.00190778
LU0537NG	1787.78	1787.91	0.1375	23091.5	23098.7	7.19508	3.92328	0.0936981	0.0661168	0.00586134	0.00753867	0.00069214
LU0538NG	1788.05	1788.33	0.275	23106.1	23120.5	14.3135	3.76935	0.0662039	0.0681743	0.0048727	0.00746828	0.00054967
LU0539NG	1788.33	1788.6	0.275	23120.5	23132.4	11.9486	2.90383	0.0646691	0.0789098	0.00532807	0.00665942	0.000473478
LU0540NG	1788.6	1788.88	0.275	23132.4	23145.1	12.7086	3.66573	0.059972	0.0779678	0.00714602	0.00830634	0.000773338
LU0541NG	1788.88	1789.15	0.275	23145.1	23157.7	12.6011	3.53897	0.107441	0.0787218	0.00571728	0.00809666	0.00063734
LU0542NG	1789.15	1789.43	0.275	23157.7	23170.5	12.8216	3.34293	0.0839292	0.0704712	0.00336437	0.00684657	0.000369305
LU0543NG	1789.43	1789.7	0.275	23170.5	23185.8	15.2415	3.65177	0.132899	0.0632912	0.00380449	0.00671709	0.000472005
LU0544NG	1789.7	1789.84	0.1375	23185.8	23194.3	8.56061	4.28271	0.12906	0.0523681	0.00403444	0.00651808	0.000539203
LU0545NG	1789.98	1790.11	0.1375	23203.7	23211.2	7.43875	3.09395	0.0813101	0.063437	0.00679651	0.00570414	0.000629247
LU0546NG	1790.25	1790.53	0.275	23219.2	23233.2	13.9379	3.27315	0.0690847	0.0714706	0.00541324	0.00679873	0.000534561
LU0547NG	1790.53	1790.8	0.275	23233.2	23244.9	11.7514	3.5916	0.0708175	0.0813139	0.00693101	0.00848764	0.000742571
LU0548NG	1790.8	1790.94	0.1375	23244.9	23250.1	5.15305	2.71583	0.129839	0.0955323	0.0104878	0.00754026	0.000902875
LU0549NG	1791.08	1791.21	0.1375	23255.9	23261.8	5.88552	3.1464	0.0943657	0.0813416	0.0079779	0.00743808	0.000762865
LU0550NG	1791.35	1791.63	0.275	23267.5	23279.6	12.088	3.75953	0.0725361	0.0820713	0.00604388	0.00896723	0.000682652
LU0551NG	1791.63	1791.9	0.275	23279.6	23290.6	10.9866	2.25366	0.0968658	0.091165	0.00818291	0.00597106	0.000594237
LU0552NG	1791.9	1792.04	0.1375	23290.6	23295.7	5.16691	2.39194	0.0682953	0.0938298	0.011749	0.00652265	0.000837706
LU0553NG	1792.18	1792.31	0.1375	23300.7	23306.6	5.91294	1.92196	0.0814608	0.0737089	0.00433387	0.00411717	0.000298417
LU0554NG	1792.45	1792.73	0.275	23312.8	23324	11.2885	2.66267	0.0936466	0.0827049	0.00539398	0.00640004	0.000474231
LU0555NG	1792.73	1793	0.275	23324	23333.9	9.82361	2.07761	0.0481889	0.0981116	0.0081828	0.00592404	0.000512833
LU0556NG	1793	1793.14	0.1375	23333.9	23338.2	4.37603	3.26546	0.148754	0.101936	0.00442755	0.00967399	0.000608902
LU0557NG	1793.28	1793.41	0.1375	23343.6	23348.4	4.84094	3.09388	0.149282	0.100148	0.0168555	0.00900492	0.00157663
LU0558NG	1793.55	1793.83	0.275	23353.5	23366.8	13.3074	2.31934	0.0744801	0.0733258	0.00527121	0.00494259	0.000389149
LU0559NG	1793.83	1794.1	0.275	23366.8	23381.1	14.339	3.17449	0.0774599	0.0641697	0.00398205	0.00592022	0.000394761
LU0560NG	1794.1	1794.24	0.1375	23381.1	23386	4.8851	4.42747	0.171013	0.0974471	0.0141533	0.0125389	0.00188446
LU0561NG	1794.38	1794.51	0.1375	23393	23400.9	7.84559	5.39491	0.329486	0.0567629	0.00235183	0.00889985	0.000656821
LU0562NG	1794.65	1794.93	0.275	23408	23422.6	14.6439	8.31846	0.409375	0.0637599	0.00351312	0.0154143	0.00113877
LU0563NG	1794.93	1795.2	0.275	23422.6	23437.3	14.6153	3.52257	0.0750764	0.0661482	0.00455481	0.00677192	0.000488125
LU0564NG	1795.2	1795.34	0.1375	23437.3	23444.1	6.87963	3.23398	0.121135	0.071439	0.00802626	0.00671439	0.000795189
LU0565NG	1795.48	1795.61	0.1375	23451.9	23458.8	6.90625	3.25507	0.0912699	0.0735659	0.00736496	0.00695937	0.00072354
LU0567NG	1795.75	1796.03	0.275	23466.8	23482.4	15.5476	4.47774	0.101201	0.0639796	0.00492092	0.00832596	0.000667457
LU0568NG	1796.03	1796.3	0.275	23482.4	23497.3	14.9524	4.04423	0.0934815	0.0635738	0.00417172	0.00747219	0.000519856
LU0569NG	1796.3	1796.44	0.1375	23497.3	23505.2	7.91667	4.94788	0.105239	0.066647	0.00761195	0.00958369	0.0011134
LU0570NG	1796.58	1796.71	0.1375	23511.7	23519.3	7.62394	4.68768	0.0911472	0.0581653	0.00354848	0.00792421	0.00050739
LU0571NG	1796.85	1797.13	0.275	23527.2	23543.6	16.4485	4.35844	0.0811099	0.0596844	0.00339747	0.00756006	0.000452762
LU0572NG	1797.13	1797.4	0.275	23543.6	23562.9	19.2574	4.01396	0.0718747	0.0478898	0.00224101	0.00558662	0.000279912
LU0273NG	1797.4	1797.54	0.1375	23562.9	23571.3	8.41502	4.36337	0.107988	0.0540082	0.00410497	0.00684882	0.000547455
LU0274NG	1797.68	1797.81	0.1375	23580	23588.4	8.36322	3.32114	0.0821397	0.0610103	0.00537669	0.00588876	0.000539012
LU0575NG	1797.95	1798.23	0.275	23595.6	23610.2	14.5703	6.9549	0.120063	0.0694336	0.0058813	0.0140344	0.00121321
LU0576NG	1798.23	1798.5	0.275	23610.2	23626.2	15.9365	4.85159	0.109315	0.0589909	0.00281034	0.00831769	0.000438342
LU0577NG	1798.5	1798.64	0.1375	23626.2	23635.7	9.52959	8.85668	0.15833	0.0511445	0.00447084	0.0131645	0.0011746
LU0578NG	1798.78	1798.91	0.1375	23644.2	23653.9	9.65401	4.20811	0.112191	0.0527973	0.00472268	0.00645703	0.000602686
LU0579NG	1799.05	1799.33	0.275	23662.1	23679.2	17.1117	5.01539	0.102008	0.0552832	0.00349975	0.0080581	0.000535806
LU0580NG	1799.33	1799.6	0.275	23679.2	23694.6	15.4085	5.13284	0.17289	0.0645129	0.00431319	0.00962361	0.000720455
LU0581NG	1799.6	1799.74	0.1375	23694.6	23704.4	9.80574	4.34671	0.115452	0.0512915	0.00452937	0.00647947	0.000597501
LU0582NG	1799.88	1800.01	0.1375	23713.4	23723	9.53016	4.52913	0.0957533	0.0514851	0.00511068	0.00677688	0.000687797
LU0583NG	1800.15	1800.43	0.275	23730.9	23747.2	16.2915	3.91984	0.185439	0.0613101	0.00453421	0.00698448	0.000613181
LU0584NG	1800.43	1800.7	0.275	23747.2	23764.2	17.0226	2.9052	0.185053	0.0607702	0.00499158	0.00513099	0.000533328
LU0585NG	1800.7	1800.84	0.1375	23764.2	23773.7	9.51099	4.53594	0.132343	0.0523274	0.00522259	0.00689811	0.000717289
LU0586NG	1800.98	1801.11	0.1375	23781.7	23789.6	7.91317	5.41317	0.447272	0.0617704	0.00574131	0.00971776	0.00120853
LU0587NG	1801.25	1801.53	0.275	23798.5	23816.5	17.9678	4.73555	0.103867	0.0539381	0.00325138	0.00742335	0.00047618
LU0588NG	1801.53	1801.8	0.275	23816.5	23833.5	16.9553	5.90309	0.119925	0.0563136	0.0027584	0.0096611	0.000512315
LU0589NG	1801.8	1801.94	0.1375	23833.5	23841.6	8.16941	5.3272	0.129546	0.0555875	0.00258507	0.00860617	0.000451641
LU0590NG	1802.08	1802.21	0.1375	23850.5	23860.3	9.74608	5.11604	0.122043	0.0515098	0.00382692	0.00765875	0.000597618
LU0591NG	1802.35	1802.63	0.275	23869.9	23886	16.1027	3.6762	0.139697	0.0599959	0.00399552	0.00640995	0.000491486
LU0592NG	1802.63	1802.9	0.275	23886	23903.2	17.2901	5.34296	0.132868	0.0578407	0.00399794	0.0089815	0.000659756
LU0293NG	1802.9	1803.04	0.1375	23903.2	23912	8.75	3.64222	0.163742	0.0543924	0.0032088	0.00575756	0.000427044
LU0594NG	1803.18	1803.31	0.1375	23921.1	23930.2	9.05825	3.80645	0.109203	0.0568512	0.00427918	0.00628917	0.000506604
LU0595NG	1803.45	1803.73	0.275	23938.9	23957.7	18.81	5.19825	0.132783	0.0524343	0.00296731	0.00792149	0.000491837
LU0596NG	1803.73	1804	0.275	23957.7	23975.9	18.2645	5.67634	0.214593	0.051216	0.00261216	0.00844905	0.000536397
LU0597NG	1804	1804.14	0.1375	23975.9	23985.3	9.37668	3.51818	0.147057	0.0486933	0.00373646	0.00497876	0.000435047
LU0598NG	1804.28	1804.41	0.1375	23994.4	24003.1	8.72535	4.49366	0.122313	0.0603586	0.00627253	0.00788266	0.000846807
LU0599NG	1804.55	1804.83	0.275	24012.8	24031.4	18.6143	4.59829	0.119393	0.0528245	0.00336715	0.00705937	0.000485879
LU0600NG	1804.83	1805.1	0.275	24031.4	24050.4	18.9636	3.96157	0.0932691	0.05092	0.00268152	0.00586258	0.000338181
LU0601NG	1805.1	1805.38	0.275	24050.4	24069	18.6447	5.49861	0.115514	0.0543389	0.00377363	0.00868355	0.000630028
LU0602NG	1805.38	1805.65	0.275	24069	24086.1	17.0969	5.85095	0.12284	0.0572595	0.00392205	0.00973662	0.000697545
LU0603NG	1805.65	1805.79	0.1375	24086.1	24095.2	9.14402	6.65102	0.145539	0.0505846	0.00405958	0.00977778	0.000813346
LU0604NG	1805.93	1806.06	0.1375	24103.2	24112.7	9.50735	4.51389	0.137064	0.0511536	0.00428153	0.00671059	0.000597493
LU0605NG	1806.2	1806.34	0.1375	24121.3	24129	7.7164	5.3701	0.121329	0.0625784	0.00500812	0.00976653	0.000812161
LU0606NG	1806.48	1806.61	0.1375	24138.5	24147.7	9.22255	5.69897	0.125365	0.0511709	0.00261673	0.00847527	0.0004718
LU0607NG	1806.75	1807.03	0.275	24156.6	24174.8	18.2614	4.33935	0.0918245	0.0530278	0.00348173	0.00668747	0.000461331
LU0608NG	1807.03	1807.3	0.275	24174.8	24192.5	17.6786	3.59691	0.10536	0.0532807	0.00238659	0.00556973	0.000298092
LU0609NG	1807.3	1807.44	0.1375	24192.5	24201.8	9.26339	3.99067	0.10058	0.0560009	0.00553114	0.00649493	0.000662053
LU0610NG	1807.58	1807.71	0.1375	24210.5	24218.5	7.98472	5.70959	0.148058	0.0586897	0.00429812	0.00973869	0.0007566
LU0611NG	1807.85	1808.13	0.275	24227.3	24244.4	17.1745	3.57529	0.0908212	0.0588698	0.00447764	0.00611699	0.00049052
LU0612NG	1808.13	1808.4	0.275	24244.4	24260.5	16.0806	3.47217	0.084531	0.0641104	0.00475252	0.00646938	0.000504777
LU0613NG	1808.4	1808.54	0.1375	24260.5	24268.3	7.73045	4.46895	0.10957	0.0616799	0.00569837	0.00801093	0.000765719
LU0614NG	1808.68	1808.81	0.1375	24275.9	24284.7	8.76978	4.30597	0.0974603	0.0520935	0.00167035	0.00651911	0.000255863
LU0615NG	1808.95	1809.23	0.275	24294.1	24312.1	18.0378	3.65749	0.0852605	0.0564297	0.00411603	0.00599826	0.000459319
LU0616NG	1809.23	1809.5	0.275	24312.1	24327.2	15.0664	5.26283	0.110976	0.0659034	0.00474858	0.01008	0.000756765
LU0617NG	1809.5	1809.64	0.1375	24327.2	24335.5	8.30934	4.60246	0.130357	0.057409	0.00460146	0.00767899	0.000652786
LU0618NG	1809.78	1809.91	0.1375	24342.8	24351.2	8.45709	3.62198	0.100538	0.0580033	0.00554027	0.00610565	0.000607317
LU0619NG	1810.05	1810.33	0.275	24360.2	24377.4	17.198	4.33564	0.0832706	0.0557227	0.00319131	0.00702134	0.000424129
LU0620NG	1810.33	1810.6	0.275	24377.4	24393.8	16.3848	5.13503	0.135274	0.0605611	0.00376336	0.00903796	0.000610015
LU0621NG	1810.6	1810.74	0.1375	24393.8	24400.7	6.92762	4.57869	0.118632	0.0694427	0.00648293	0.00924064	0.000895282
LU0622NG	1810.88	1811.01	0.1375	24408.3	24416.7	8.42009	4.01257	0.124379	0.0625598	0.00746309	0.00729545	0.000899212
LU0623NG	1811.15	1811.43	0.275	24426.3	24444.5	18.1894	3.75929	0.0725776	0.0578953	0.00413317	0.00632533	0.000467789
LU0624NG	1811.43	1811.7	0.275	24444.5	24460.4	15.8773	4.12074	0.0744229	0.0605836	0.00430732	0.00725544	0.000532225
LU0625NG	1811.7	1811.84	0.1375	24460.4	24469.1	8.65288	5.17836	0.36418	0.0601607	0.00587797	0.00905396	0.00108995
LU0626NG	1811.98	1812.11	0.1375	24477.9	24485.3	7.39046	3.62686	0.115067	0.0647947	0.0054821	0.00682974	0.000617136
LU0627NG	1812.25	1812.53	0.275	24493	24509.1	16.1176	4.32144	0.128707	0.0606734	0.00398439	0.00762011	0.000549468
LU0628NG	1812.53	1812.8	0.275	24509.1	24527.4	18.246	3.64142	0.0922141	0.0530178	0.0024966	0.00561081	0.000299994
LU0629NG	1812.8	1812.94	0.1375	24527.4	24536.8	9.39102	3.52965	0.126584	0.0536767	0.0051951	0.00550619	0.000568325
LU0630NG	1813.08	1813.21	0.1375	24545.8	24554.8	9.09762	5.20684	0.120108	0.0515349	0.00157286	0.00779846	0.000298345
LU0631NG	1813.35	1813.63	0.275	24564.4	24583.4	19.0118	3.85696	0.160915	0.0531515	0.00329606	0.00595791	0.000445299
LU0632NG	1813.63	1813.9	0.275	24583.4	24601.1	17.7216	4.27911	0.104541	0.055557	0.00363008	0.00690916	0.000481968
LU0633NG	1813.9	1814.04	0.1375	24601.1	24610	8.89792	3.64995	0.122998	0.0515394	0.00213886	0.00546714	0.000292265
LU0634NG	1814.18	1814.31	0.1375	24619.3	24628.9	9.59776	4.40966	0.20052	0.0498954	0.00459032	0.0063944	0.000656215
LU0635NG	1814.45	1814.73	0.275	24638.3	24655.8	17.5023	4.34806	0.111337	0.0601787	0.00474156	0.00760453	0.000630018
LU0636NG	1814.73	1815	0.275	24655.8	24673.5	17.725	5.39102	0.127827	0.0543681	0.00323456	0.00851821	0.000545546
LU0637NG	1815	1815.28	0.275	24673.5	24693	19.4586	5.84346	0.19756	0.0503616	0.00297528	0.0085527	0.000582168
LU0638NG	1815.28	1815.55	0.275	24693	24712.2	19.208	5.48394	0.161586	0.051638	0.00302843	0.00822992	0.000540157
LU0639NG	1815.55	1815.83	0.275	24712.2	24730.3	18.1667	3.81269	0.0793108	0.0537024	0.00289357	0.00595057	0.000343691
LU0640NG	1815.83	1816.1	0.275	24730.3	24748	17.6167	4.45899	0.121815	0.0555726	0.00337009	0.00720164	0.000478999
LU0641NG	1816.1	1816.24	0.1375	24748	24755.8	7.83571	3.75589	0.119099	0.0631847	0.00647678	0.00689696	0.000740032
LU0642NG	1816.38	1816.51	0.1375	24765	24774	9.00647	4.48169	0.134656	0.0551275	0.00325231	0.00718031	0.000475384

## Sheet: 3) WDC 10Be
sample ID (PRIME)	Top depth (m)	Bottom depth (m)	Length (m)	Top Age (yr b2k)	Bottom Age (yr b2k)	Interval (yr)	10Be conc. (10^4 at/g) (blank corrected)	err. 10Be conc. (10^4 at/g)	Acc. Rate (m_ice/y)	err. Acc. Rate (m ice/yr)	10Be flux (atm/cm^2/s)	err. 10Be flux (atm/cm^2/s)
WDDC 55	2453.26	2455.25	1.998	18578.5	18643.9	65.4444	3.94954	0.0876119	0.0945724	0.00216079	0.0108554	0.000850509
WDDC 56	2455.26	2457.26	1.998	18644	18706.1	62.0218	3.93848	0.0906823	0.0996301	0.00245425	0.0114039	0.000916074
WDDC 57	2457.26	2459.19	1.933	18706.1	18768	61.8172	3.23911	0.0732805	0.0970166	0.00231865	0.00913285	0.000793859
WDDC 58	2459.19	2461.26	2.065	18768	18836.8	68.7857	3.61908	0.0934497	0.0931343	0.0022933	0.00979585	0.000861874
WDDC 59	2461.26	2463.25	1.995	18836.8	18898.5	61.625	3.54421	0.110085	0.100652	0.00228609	0.0103676	0.000998714
WDDC 60	2463.36	2465.25	1.894	18901.7	18963.7	61.911	3.38995	0.104535	0.095482	0.00245524	0.00940694	0.00092923
WDDC 61	2465.25	2467.26	2.001	18963.8	19027.9	64.1752	3.1695	0.0940878	0.0965	0.0020364	0.00888899	0.00088047
WDDC 62	2467.26	2469.19	1.928	19028	19091.9	63.9083	3.14468	0.0969529	0.0948138	0.00241138	0.00866526	0.000885848
WDDC 63	2469.19	2471.31	2.12	19091.9	19160.1	68.1179	3.92046	0.137336	0.0971553	0.00222689	0.0110697	0.00107671
WDDC 64	2471.31	2473.26	1.949	19160.1	19224.7	64.5745	3.2748	0.0985185	0.0945715	0.00213325	0.00900074	0.000886255
WDDC 65	2473.26	2475.26	1.997	19224.8	19291.1	66.2852	3.37738	0.0859523	0.0947753	0.00213664	0.00930269	0.000834317
WDDC 66	2475.26	2477.26	1.997	19291.2	19359	67.857	3.50423	0.0849401	0.0924091	0.00214317	0.00941112	0.00081258
WDDC 67	2477.26	2479.21	1.947	19359.1	19420.7	61.5598	3.78381	0.10855	0.099308	0.00223313	0.0109206	0.000982093
WDDC 68	2479.21	2481.26	2.045	19420.8	19487.5	66.7521	3.76113	0.104956	0.0962947	0.00231455	0.0105258	0.000941288
WDDC 69	2481.26	2483.21	1.95	19487.6	19546.1	58.5159	3.67658	0.100351	0.105765	0.00283852	0.0113011	0.00101987
WDDC 70	2483.21	2485.26	2.045	19546.2	19611.7	65.512	4.11848	0.0729022	0.0989338	0.00231143	0.0118417	0.000824159
WDDC 71	2485.26	2487.21	1.947	19611.8	19676.4	64.5361	3.75627	0.0814644	0.0954911	0.00221238	0.0104245	0.000828104
WDDC 72	2487.21	2489.26	2.046	19676.5	19740.4	63.9455	3.91406	0.115939	0.101374	0.00226381	0.0115316	0.0010357
WDDC 73	2489.26	2491.21	1.947	19740.5	19798.9	58.3646	3.97111	0.11137	0.106015	0.00255063	0.0122353	0.00106953
WDDC 74	2491.21	2493.26	2.046	19799	19866.1	67.0541	3.58966	0.100795	0.0964385	0.00203722	0.0100609	0.000914854
WDDC 75	2493.26	2495.26	1.998	19866.1	19931.8	65.6807	4.22236	0.0985236	0.0969228	0.00239754	0.0118937	0.000931823
WDDC 76	2495.26	2497.26	1.997	19931.9	19999.3	67.3719	4.32007	0.0804051	0.095402	0.00222333	0.0119779	0.000834285
WDDC 77	2497.26	2499.26	1.997	19999.4	20059.6	60.1889	4.14434	0.125946	0.107152	0.00280758	0.0129059	0.00115574
WDDC 78	2499.26	2501.21	1.948	20059.6	20119.1	59.4611	4.19224	0.0856113	0.104731	0.00244233	0.0127602	0.000938983
WDDC 79	2501.21	2503.11	1.898	20119.2	20182.7	63.5436	3.96788	0.105825	0.0958066	0.00249169	0.0110481	0.000950262
WDDC 80	2503.21	2505.26	2.047	20186.6	20252.8	66.1817	4.8517	0.0891214	0.099202	0.00223778	0.0139878	0.000916703
WDDC 81	2505.26	2507.26	1.999	20252.9	20314.6	61.7451	4.41747	0.125561	0.10432	0.00245066	0.013393	0.00111943
WDDC 82	2507.26	2509.21	1.948	20314.7	20376	61.2357	4.30939	0.127089	0.102246	0.00249077	0.0128055	0.00110431
WDDC 83	2509.21	2511.26	2.048	20376	20443.5	67.4622	3.74842	0.0878593	0.0986313	0.0020482	0.0107448	0.000878464
WDDC 84	2511.26	2513.26	1.998	20443.6	20505.5	61.893	3.98146	0.11154	0.10567	0.00270036	0.0122273	0.0010722
WDDC 85	2513.27	2515.26	1.999	20505.5	20571.1	65.5905	5.3675	0.127957	0.0997947	0.00240145	0.0155673	0.00110302
WDDC 86	2515.27	2517.26	1.997	20571.2	20633.1	61.8879	4.45166	0.101449	0.104626	0.00223409	0.0135362	0.00101071
WDDC 87	2517.27	2519.27	1.999	20633.2	20693.8	60.5526	4.45003	0.122156	0.107583	0.00273703	0.0139137	0.00114869
WDDC 88	2519.27	2521.27	1.998	20693.9	20756.1	62.216	4.34563	0.117693	0.105407	0.00246925	0.0133124	0.00109623
WDDC 89	2521.27	2523.27	1.998	20756.2	20815.3	59.1171	3.95177	0.0961255	0.110793	0.00300215	0.0127244	0.00105617
WDDC 90	2523.37	2525.33	1.956	20817.9	20880.5	62.5949	3.74897	0.0992308	0.103755	0.00236104	0.0113046	0.000984093
WDDC 91	2525.33	2527.27	1.946	20880.5	20943.7	63.2	3.86639	0.0752817	0.100585	0.00218116	0.0113025	0.000838684
WDDC 92	2527.28	2529.27	1.997	20943.8	21009	65.218	3.64575	0.086993	0.0998219	0.00217148	0.0105766	0.000886054
WDDC 93	2529.28	2531.28	1.998	21009.1	21079.2	70.173	3.6424	0.0921803	0.0948073	0.00204495	0.0100361	0.00086411
WDDC 94	2531.28	2533.28	1.999	21079.3	21147	67.7228	3.35052	0.0636965	0.0978035	0.00236098	0.00952359	0.000753313
WDDC 95	2533.28	2535.32	2.042	21147.1	21215.8	68.6852	3.84333	0.0652996	0.0981448	0.00227568	0.0109625	0.000771931
WDDC 96	2535.32	2537.33	2.006	21215.8	21281.2	65.4	3.8189	0.088287	0.101716	0.00225798	0.0112891	0.000913407
WDDC 97	2537.33	2539.28	1.946	21281.3	21346.6	65.2292	4.11854	0.102418	0.0995033	0.00240825	0.0119101	0.000969317
WDDC 98	2539.28	2541.28	2	21346.7	21421.5	74.8655	3.78536	0.0667882	0.0897367	0.00211987	0.00987213	0.000713198
WDDC 99	2541.28	2543.28	1.997	21421.7	21492.5	70.8062	4.53296	0.0990597	0.0944706	0.00227703	0.0124455	0.000914716
WDDC 100	2543.38	2545.28	1.899	21496.3	21563	66.7588	4.30613	0.118278	0.0949726	0.0020549	0.0118855	0.000983477
WDDC 101	2545.28	2547.28	1.998	21563.2	21630.2	67.0022	4.30336	0.0847257	0.10047	0.00243885	0.0125655	0.000902996
WDDC 102	2547.29	2549.28	1.998	21630.2	21700.5	70.2719	4.03185	0.0752956	0.0953164	0.00237181	0.0111688	0.000809341
WDDC 103	2549.29	2551.28	1.997	21700.6	21770.1	69.4877	4.32628	0.112543	0.0963387	0.00192107	0.0121129	0.000969839
WDDC 104	2551.29	2553.33	2.046	21770.2	21839.4	69.1736	5.3565	0.160578	0.0997514	0.00216155	0.0155287	0.00120946
WDDC 105	2553.34	2555.28	1.948	21839.4	21907.7	68.2094	5.21366	0.092338	0.0968453	0.00219733	0.0146742	0.000917789
WDDC 106	2555.29	2557.28	1.997	21907.8	21974	66.2708	4.14616	0.0781373	0.101589	0.00222695	0.0122412	0.000867823
WDDC 107	2557.29	2559.28	1.998	21974.2	22047.7	73.5497	3.99379	0.0720768	0.0914367	0.00216227	0.010613	0.000756289
WDDC 108	2559.29	2561.28	1.996	22047.8	22116.4	68.6073	4.09929	0.0712889	0.0994823	0.00259573	0.0118519	0.00083159
WDDC 109	2561.29	2563.28	1.998	22116.5	22184.8	68.3312	4.02449	0.102584	0.0992508	0.00228953	0.0116086	0.000961892
WDDC 110	2563.39	2565.29	1.901	22188.8	22256.3	67.5257	4.48396	0.0983299	0.0956717	0.00218051	0.0124675	0.000917023
WDDC 111	2565.29	2567.28	1.992	22256.4	22325.7	69.2738	4.01772	0.0774878	0.0983228	0.00241192	0.0114807	0.00084382
WDDC 112	2567.28	2569.29	2.008	22325.7	22389.8	64.0909	3.93307	0.0683509	0.107116	0.00252121	0.0122439	0.000863398
WDDC 113	2569.3	2571.29	1.996	22389.8	22457.4	67.5746	4.28889	0.0824546	0.101497	0.00236886	0.0126512	0.000897014
WDDC 114	2571.29	2573.29	1.998	22457.5	22525	67.4271	3.87898	0.0747262	0.101151	0.00226397	0.011403	0.000843156
WDDC 115	2573.29	2575.29	1.998	22525	22592	67.0745	4.1995	0.108088	0.10231	0.00233565	0.0124867	0.00101827
WDDC 116	2575.29	2577.29	2	22592.2	22662.1	69.9612	4.72465	0.0917789	0.0983775	0.00215788	0.0135083	0.000915444
WDDC 117	2577.3	2579.29	1.997	22662.2	22727.2	64.9417	4.24599	0.0944734	0.106701	0.00270267	0.0131668	0.0010098
WDDC 118	2579.3	2581.29	1.998	22727.3	22794.9	67.5919	4.02729	0.105373	0.102091	0.00256687	0.0119491	0.00100891
WDDC 119	2581.3	2583.29	1.997	22794.9	22859.8	64.8556	4.44008	0.0889034	0.10681	0.00249396	0.0137828	0.000979915
WDDC 120	2583.4	2585.29	1.896	22863.5	22930.3	66.8095	4.37259	0.112965	0.0984679	0.0021307	0.0125132	0.00099922
WDDC 121	2585.3	2587.34	2.049	22930.4	23002.6	72.2132	4.56086	0.0972493	0.0985766	0.00202241	0.0130663	0.000932761
WDDC 122	2587.35	2589.3	1.949	23002.7	23065.5	62.7602	4.0114	0.0881797	0.108597	0.0027379	0.0126604	0.000990068
WDDC 123	2589.3	2591.3	1.999	23065.5	23134.3	68.802	3.73895	0.0583937	0.102028	0.00260034	0.0110868	0.000770237
WDDC 124	2591.3	2593.3	1.997	23134.4	23204.9	70.4517	3.39805	0.0716041	0.0986514	0.00215904	0.00974241	0.000796273
WDDC 125	2593.3	2595.3	1.998	23205	23274.7	69.7347	3.80501	0.0744055	0.100553	0.00224628	0.0111195	0.00083494
WDDC 126	2595.3	2597.3	1.998	23274.8	23346.4	71.5875	3.85978	0.079129	0.0982121	0.00228914	0.011017	0.000842972
WDDC 127	2597.3	2599.3	1.998	23346.5	23416.1	69.6263	3.98574	0.073343	0.100951	0.00220713	0.0116937	0.000834674
